# Supplementary material for: Effect of phacoemulsification on facility of outflow
Source: PubMed Central journal article supplement — Br J Ophthalmol. 2018 Apr 13;102(11):1520–6. doi: 10.1136/bjophthalmol-2017-311548 (PMC6241621; doi:10.1136/bjophthalmol-2017-311548), 2018-04-13
Supplement: bjophthalmol-2017-311548supp001.pdf [file bjophthalmol-2017-311548supp001.pdf]

1 **Appendix. Goldmann equation**

2 The aqueous production (flow) rate is equal to the sum of trabecular outflow and  
3 uveoscleral outflow

4 
$$Ff = (Pi - Pe). C + Fu$$

5  
6 where,  $Ff$  is aqueous humour flow measured by fluorophotometry,  $Pi$  is intraocular  
7 pressure in the anterior chamber,  $Pe$  is the episcleral venous pressure,  $C$  is trabecular  
8 outflow facility measured by tonography and  $Fu$  is uveoscleral outflow.

9 In this study, “ $C$ ” was measured at baseline and at 3, 6 and 12 months, while  
10 phacoemulsification is assumed to have no effect on  $Ff$ ,  $Fu$  and  $Pe$ . We considered  
11  $Ff$  to be 2.5  $\mu\text{l}/\text{min}$ ,  $Fu$  to be 1  $\mu\text{l}/\text{min}$  and  $Pe$  to be 8 mmHg. Therefore, a 10% drop  
12 in  $Pi$ , consistent with the IOP decrease observed at 6 months, should correspond to  
13 18% increase in “ $C$ ”. In addition, a 12% drop in  $Pi$ , should correspond to 13%  
14 increase in “ $C$ ” at 3 months. Furthermore, we observed a 10% drop in  $Pi$  should  
15 correspond to 11% improvement in “ $C$ ” at 12 months.

16  
17

18
